# Supplementary material for: Different Effects of SSRIs, Bupropion, and Trazodone on Mitochondrial Functions and Monoamine Oxidase Isoform Activity
Source: MDPI journal article supplement (doi:10.3390/antiox12061208), 2023-06-02
Supplement: s1 [file s1]

# Different Effects of SSRIs, Bupropion, and Trazodone on Mitochondrial Functions and Monoamine Oxidase Isoform Activity

Matej Lupták <sup>1,\*</sup>, Zdeněk Fišar <sup>2</sup> and Jana Hroudová <sup>1,2,\*</sup>

<sup>1</sup> Institute of Pharmacology, First Faculty of Medicine, Charles University and General University Hospital in Prague, Albertov 4, 128 00 Prague, Czech Republic

<sup>2</sup> Department of Psychiatry, First Faculty of Medicine, Charles University and General University Hospital in Prague, Ke Karlovu 11, 120 00 Prague, Czech Republic; zfišar@lf1.cuni.cz

\* Correspondence: mat.luptak@gmail.com (M.L.); jana.hroudova@vfn.cz (J.H.); Tel.: +420-224965122 (M.L. & J.H.)

## Content:

- The effect of antidepressants on citrate synthase (CS) and malate dehydrogenase (MDH) activities (Table S1)

**Table S1: The effect of antidepressants on citrate synthase (CS) and malate dehydrogenase (MDH) activities**

| drug         | concentration | CS<br>(% of control) | N | MDH<br>(% of control) | N |
|--------------|---------------|----------------------|---|-----------------------|---|
| bupropion    | 10 $\mu$ M    | *105.6 $\pm$ 1.29    | 3 | 99.2 $\pm$ 2.90       | 3 |
| bupropion    | 100 $\mu$ M   | 99.5 $\pm$ 0.93      | 3 | 99.6 $\pm$ 2.72       | 3 |
| escitalopram | 10 $\mu$ M    | 102.4 $\pm$ 3.60     | 3 | 98.0 $\pm$ 6.10       | 3 |
| escitalopram | 100 $\mu$ M   | *97.2 $\pm$ 1.52     | 3 | 99.6 $\pm$ 2.64       | 3 |
| fluvoxamine  | 10 $\mu$ M    | *106.3 $\pm$ 1.22    | 3 | 99.9 $\pm$ 0.77       | 3 |
| fluvoxamine  | 100 $\mu$ M   | 100.5 $\pm$ 1.23     | 3 | 98.3 $\pm$ 2.86       | 3 |
| paroxetine   | 10 $\mu$ M    | *105.8 $\pm$ 1.69    | 3 | 100.1 $\pm$ 2.22      | 3 |
| paroxetine   | 100 $\mu$ M   | *98.4 $\pm$ 0.85     | 3 | 97.9 $\pm$ 1.71       | 3 |
| sertraline   | 10 $\mu$ M    | *105.2 $\pm$ 1.99    | 3 | 99.2 $\pm$ 2.90       | 3 |
| sertraline   | 100 $\mu$ M   | 97.9 $\pm$ 1.83      | 3 | 97.8 $\pm$ 6.35       | 3 |
| trazodone    | 10 $\mu$ M    | 109.0 $\pm$ 6.02     | 3 | 99.2 $\pm$ 2.90       | 3 |
| trazodone    | 100 $\mu$ M   | **96.0 $\pm$ 0.80    | 3 | 99.0 $\pm$ 1.62       | 3 |

The values are expressed as the mean  $\pm$  SD for 3 independent measurements. Statistical significance was tested using a one sample *t*-test that mean value is equal to 100% and is expressed as \**p* < 0.05.

\*\**p* < 0.01. N is number of measurements.
